# Supplementary material
Source: Springer Nature journal article supplement (https://www.springermedizin.de/resource/supplementary/12985_2008_487_MOESM4_ESM.pdf/9607858)

Day 3

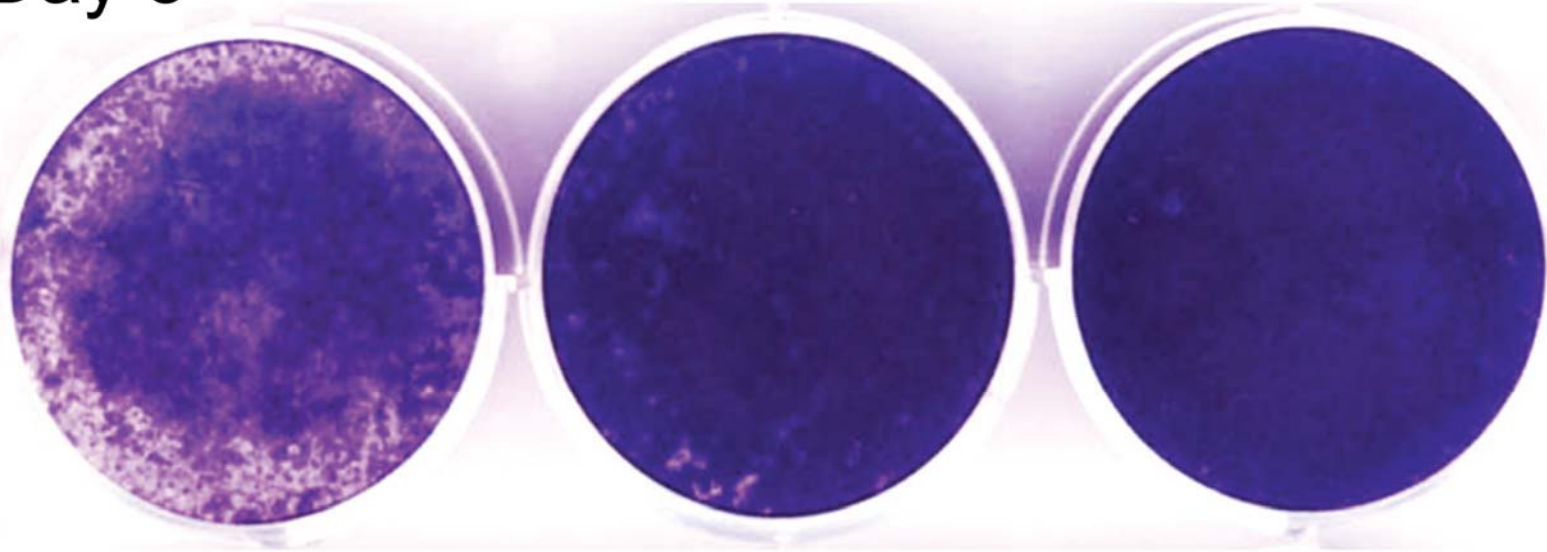

Day 4

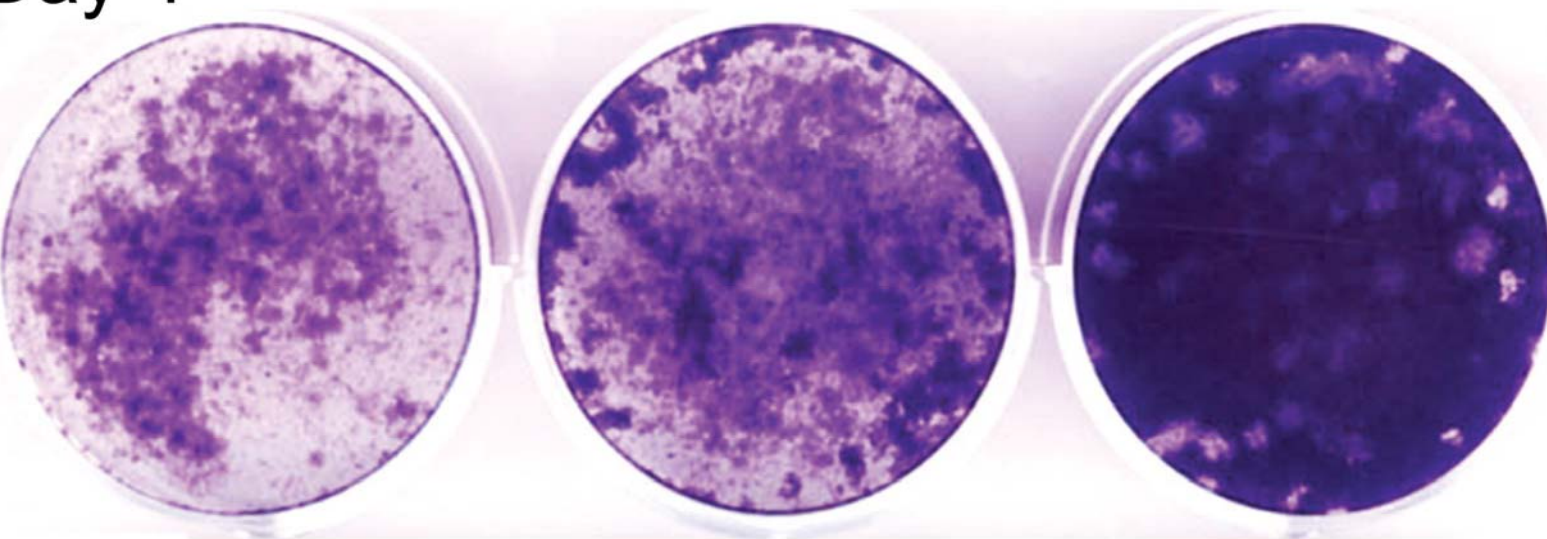

Day 5

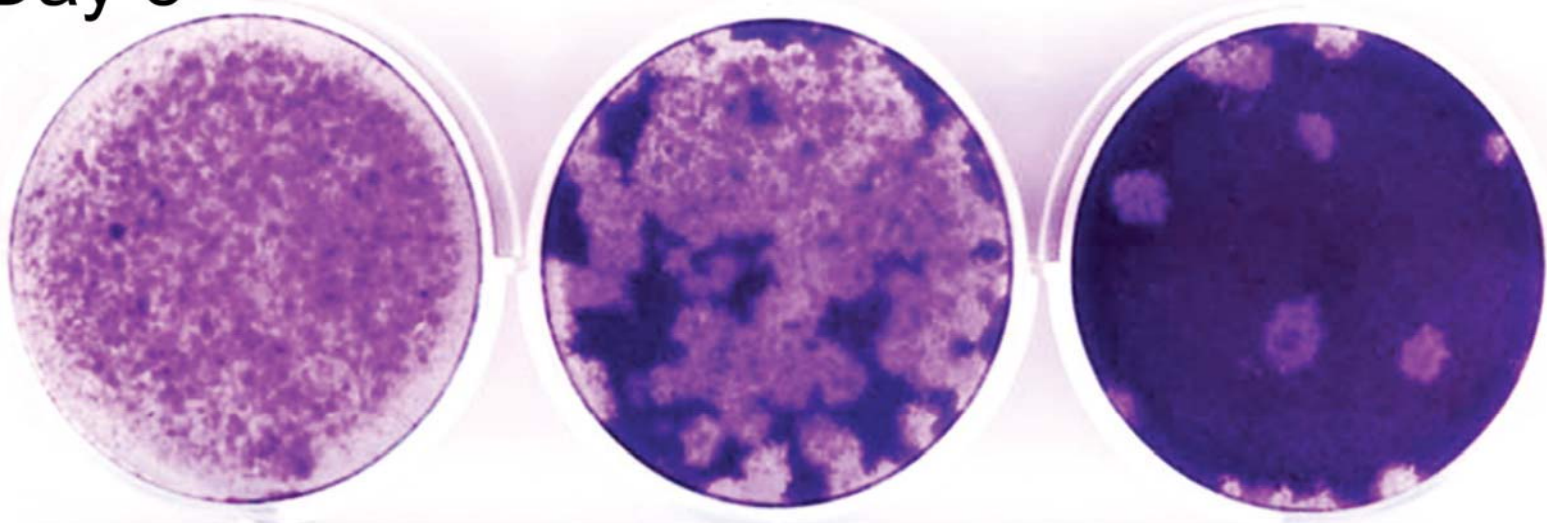

10E-1

10E-2

10E-3

Supplement: MOESM4 [file 9607858]
